# Supplementary material
Source: PubMed Central journal article supplement (PMC6733271)
Supplement: NIHMS1048806-supplement-Suppl_Material.pdf [file NIHMS1048806-supplement-Suppl_Material.pdf]

## **Supplemental Information**

Increased excitation-inhibition ratio stabilizes synapse and circuit excitability  
in four autism mouse models

Michelle W. Antoine, Tomer Langberg, Philipp Schnepel, Daniel E. Feldman

Supplemental Information contains:

Supplemental Figures 1-7

Supplemental Figure Legends

Supplemental Tables 1-4

Supplemental Table Legends

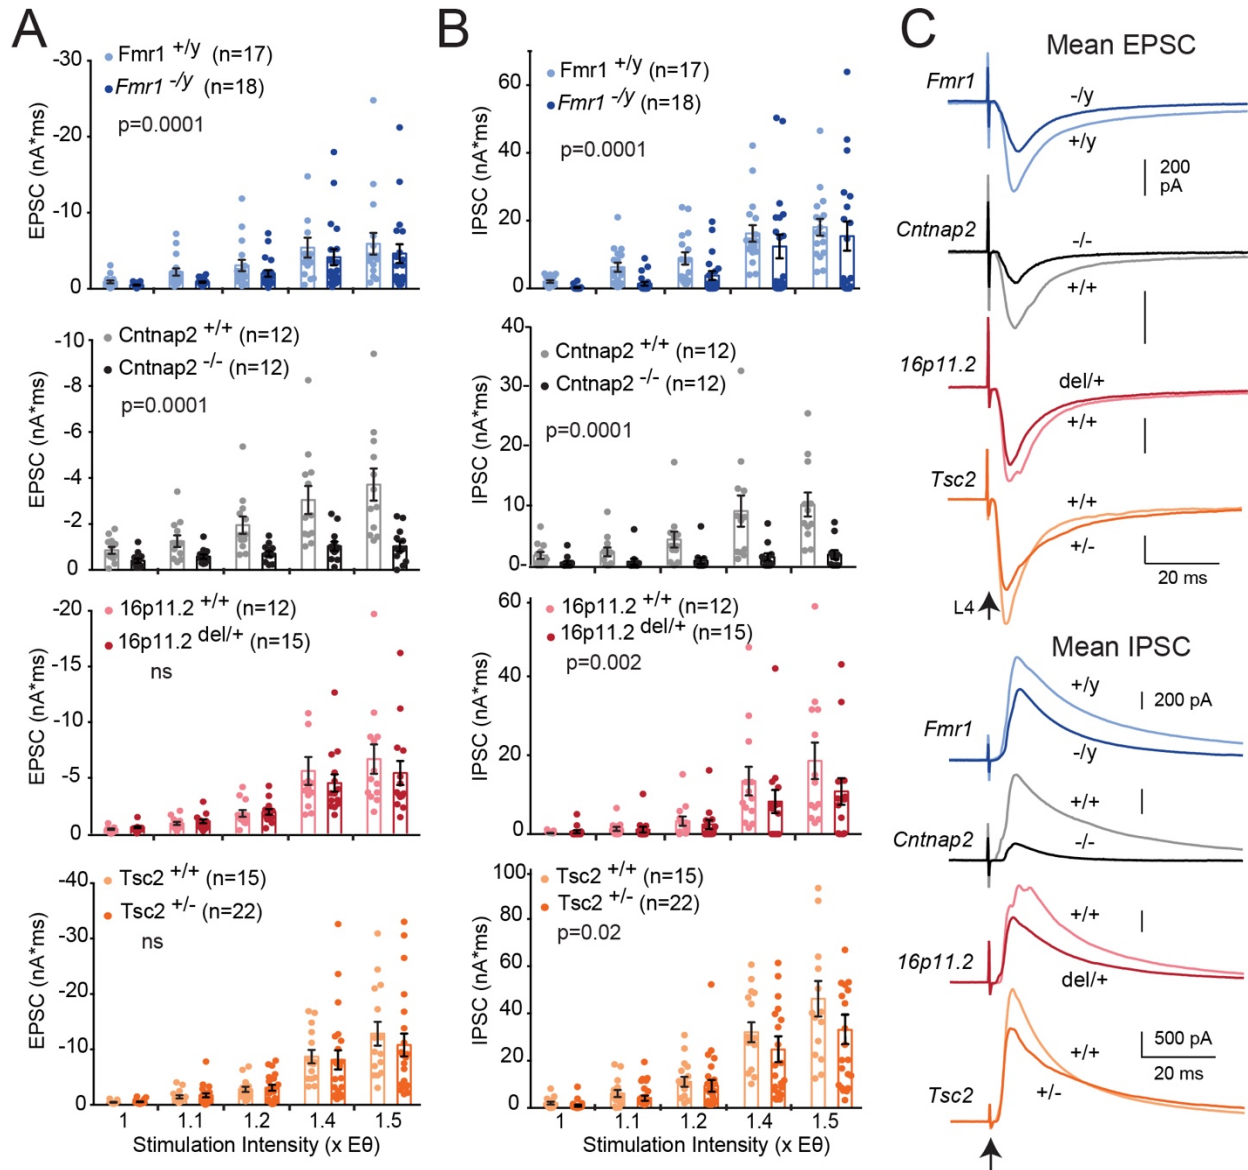

**Figure S1. Individual cell data points and mean EPSC and IPSC waveforms for the input-output curve experiment in Figure 1. Related to Figure 1.**

(A) Input-output curves for EPSCs. Each point is a cell. Bars show mean  $\pm$  SEM. P-values are for genotype factor in a 2-way ANOVA on log-transformed data. N are number of cells.

(B) Input-output curves for IPSCs.

(C) Mean EPSC and IPSC waveforms at 1.4x E $\theta$ , across all cells in (A) and (B).

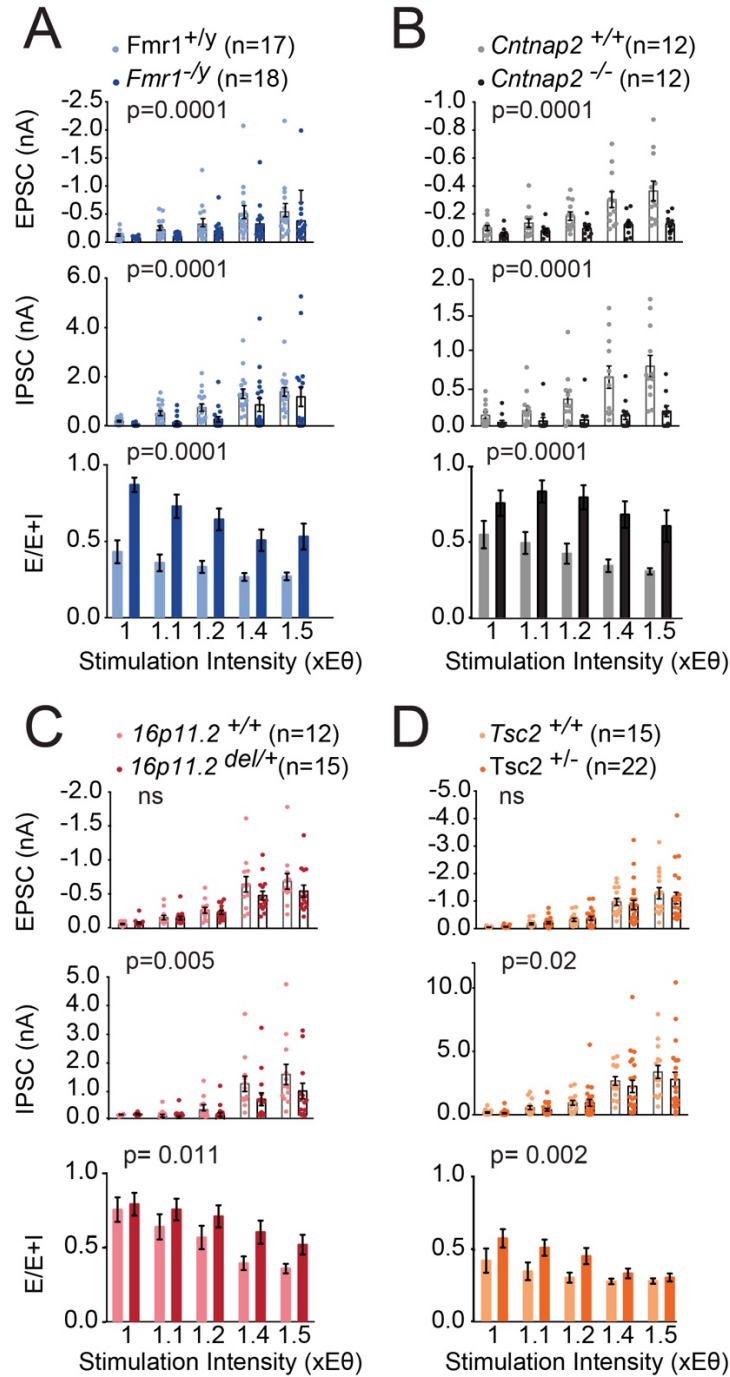

**Figure S2. EPSC, IPSC and E-I ratio for the cells in Figure 1 analyzed by peak current amplitude. Related to Figure 1.**

**(A)** Reanalysis of Figure 1 input-output curves for L4-evoked EPSCs, IPSCs, and E-I ratio in *Fmr1*<sup>-/y</sup> and *Fmr1*<sup>+/y</sup> mice, analyzed by peak current amplitude. Conventions as in Figure S1. P-values are for genotype factor in 2-way ANOVA on log-transformed data.

**(B-D)** Same analysis for *Cntnap2*<sup>-/-</sup>, *16p11.2*<sup>del/+</sup> and *Tsc2*<sup>+/-</sup> and corresponding wild types.

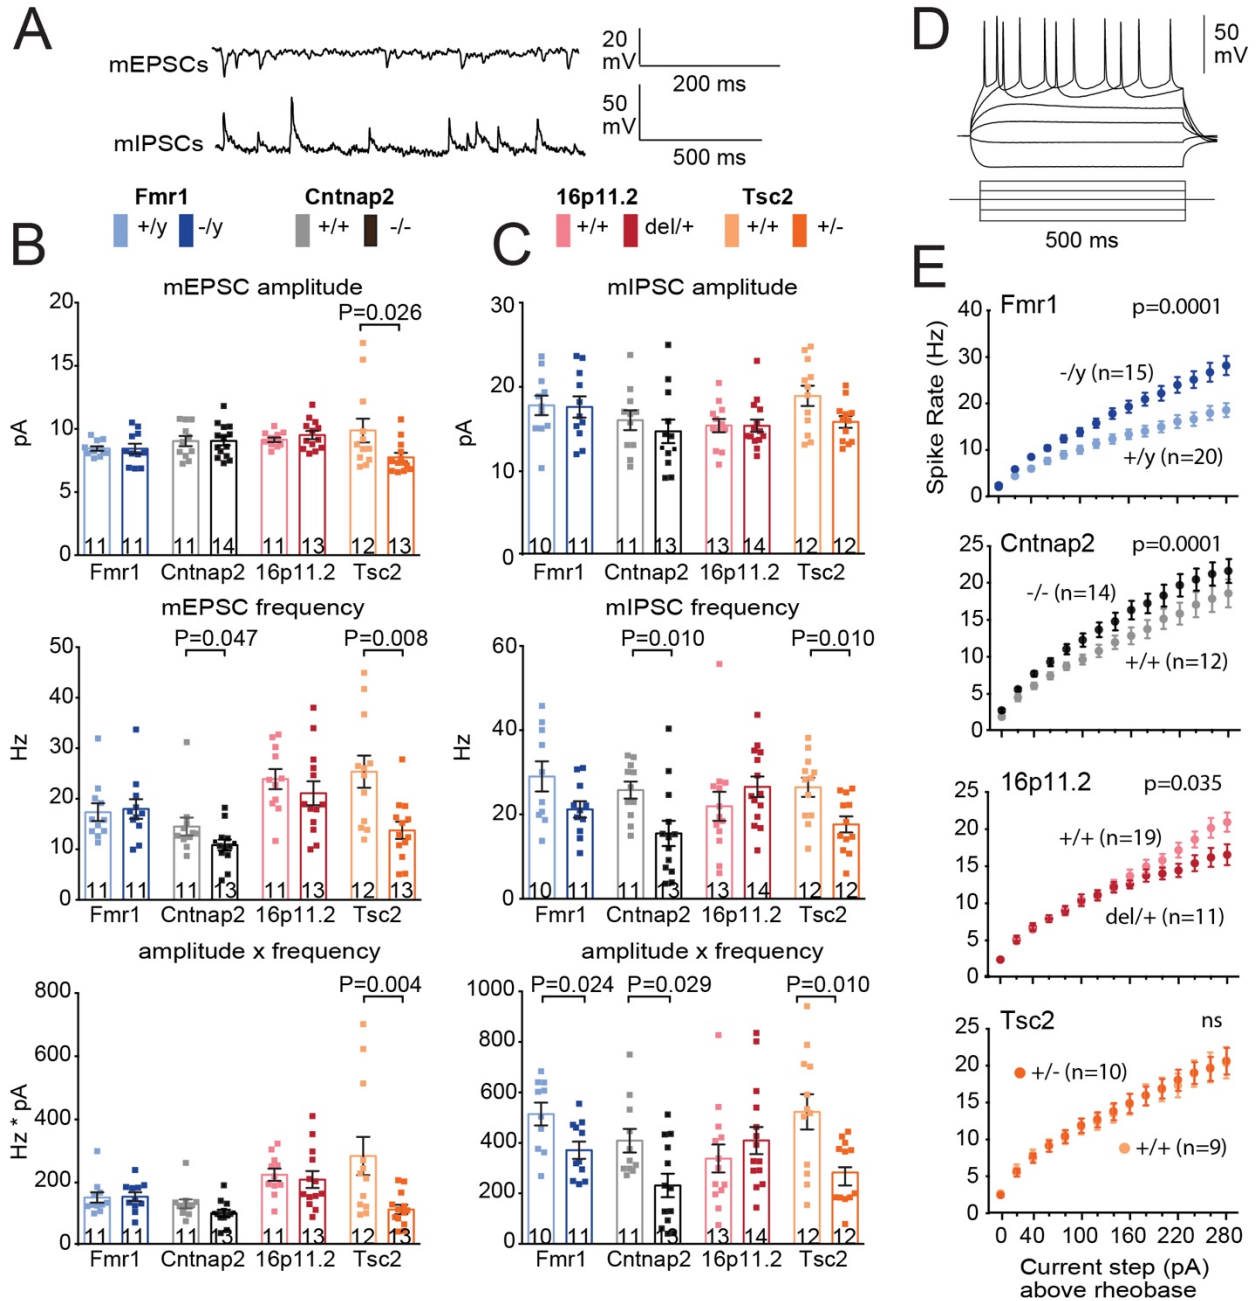

**Figure S3. Miniature synaptic currents and intrinsic excitability in L2/3 PYR cells. Related to Figure 1.**

(A) Example mEPSCs and mIPSCs traces.

(B) mEPSC amplitude, frequency and overall activity (product of amplitude x frequency within each cell). Each dot is one cell. Bars, mean  $\pm$  SEM. Numbers are cell n.

(C) mIPSC amplitude, frequency and overall activity. P-values from Mann-Whitney test between ASD mutant and corresponding wild type. Overall mIPSC activity was reduced 3 strains (*Fmr1*<sup>-/y</sup>, *Cntnap2*<sup>-/-</sup> and *Tsc2*<sup>+/-</sup>) relative to wild type. mEPSC activity was normal in 3 strains, but was reduced in *Tsc2*<sup>+/-</sup>.

**(D)** F-I curve protocol showing current injection (500 ms) and evoked spiking in one L2/3 PYR cell.

**(E)** Quantification of evoked spiking for F-I curves across all cells (9-20 cells per genotype). Points show mean  $\pm$  SEM. p-values report genotype effect in 2-factor ANOVA on log-transformed data. *Fmr1*<sup>-/-</sup> and *Cntnap2*<sup>-/-</sup> exhibited increased spiking relative to wild type, while *16p11.2*<sup>del/+</sup> showed reduced spiking,

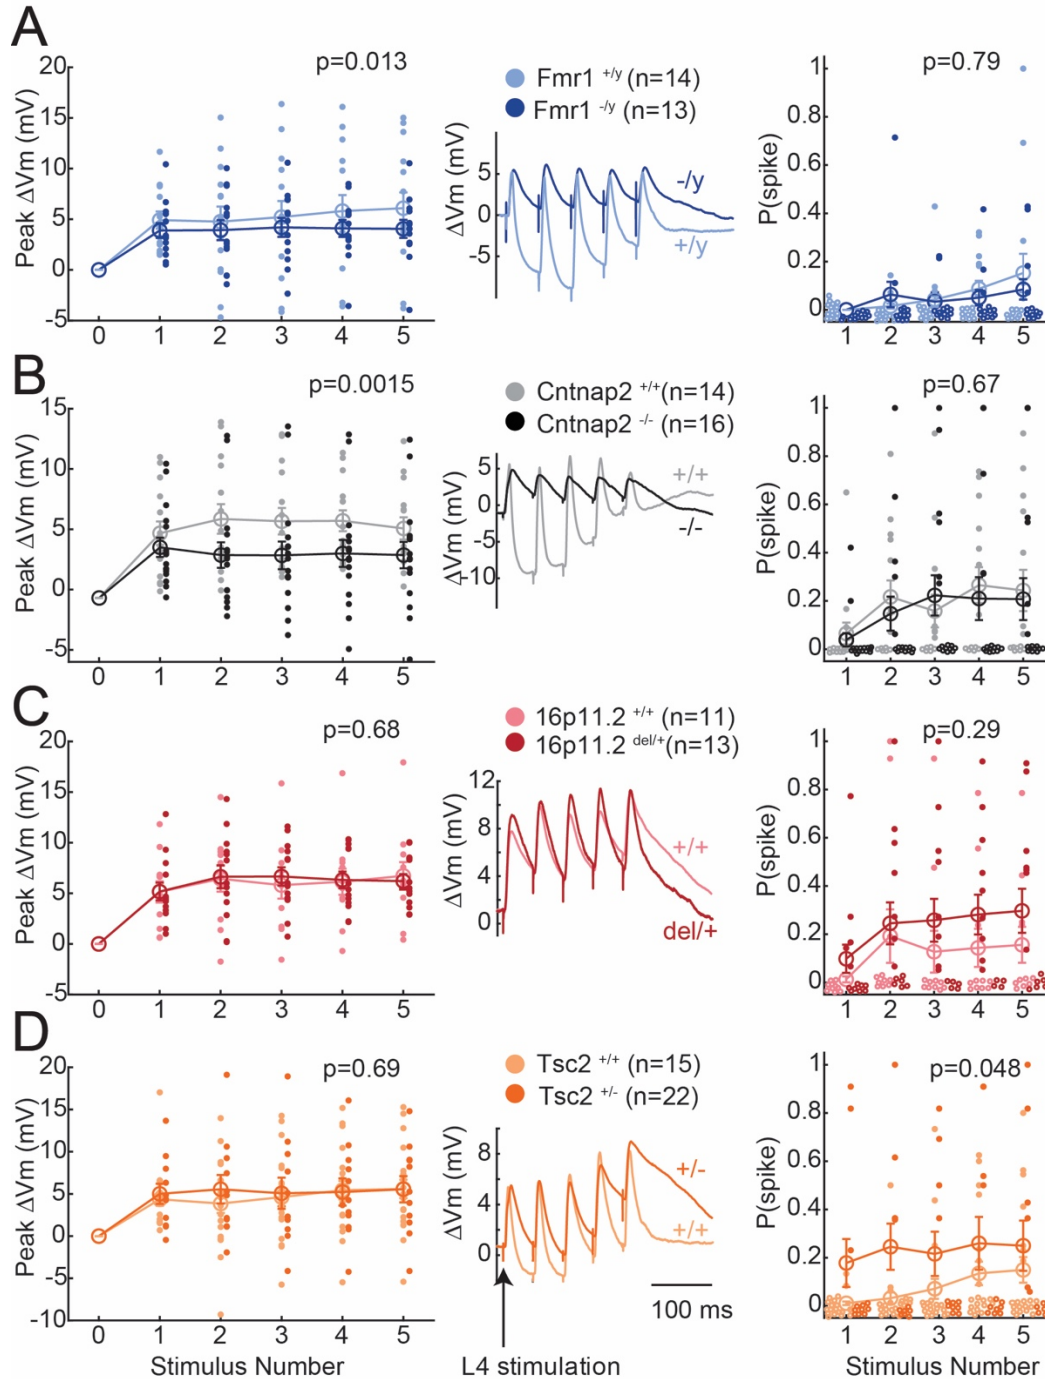

**Figure S4. L4 train-evoked PSPs and spikes in L2/3 PYR cells. Related to Figure 2.**

(A) Amplitude of PSPs evoked by L4 stimulus trains (5 pulses at 20 Hz) from baseline Vm of -50 mV. L4 stimulation was at 1.4x E $\theta$ . Amplitude of each PSP was calculated relative to pre-train baseline Vm. Each small point is one cell, open points and error bars are mean  $\pm$  SEM for the cell population. p-values are for genotype factor within a 2-factor ANOVA.

**(B)** PSP waveforms for example cells for the experiment in (A). In the y-axis,  $V_m$  is relative to pre-stimulus baseline (mV).

**(C)** Train-evoked spike probability for the same experiment. P-values are from permutation test on total number of evoked spikes in the train ( $\alpha=0.05$ ). Points at  $y=0$  are spread out to allow visualization.

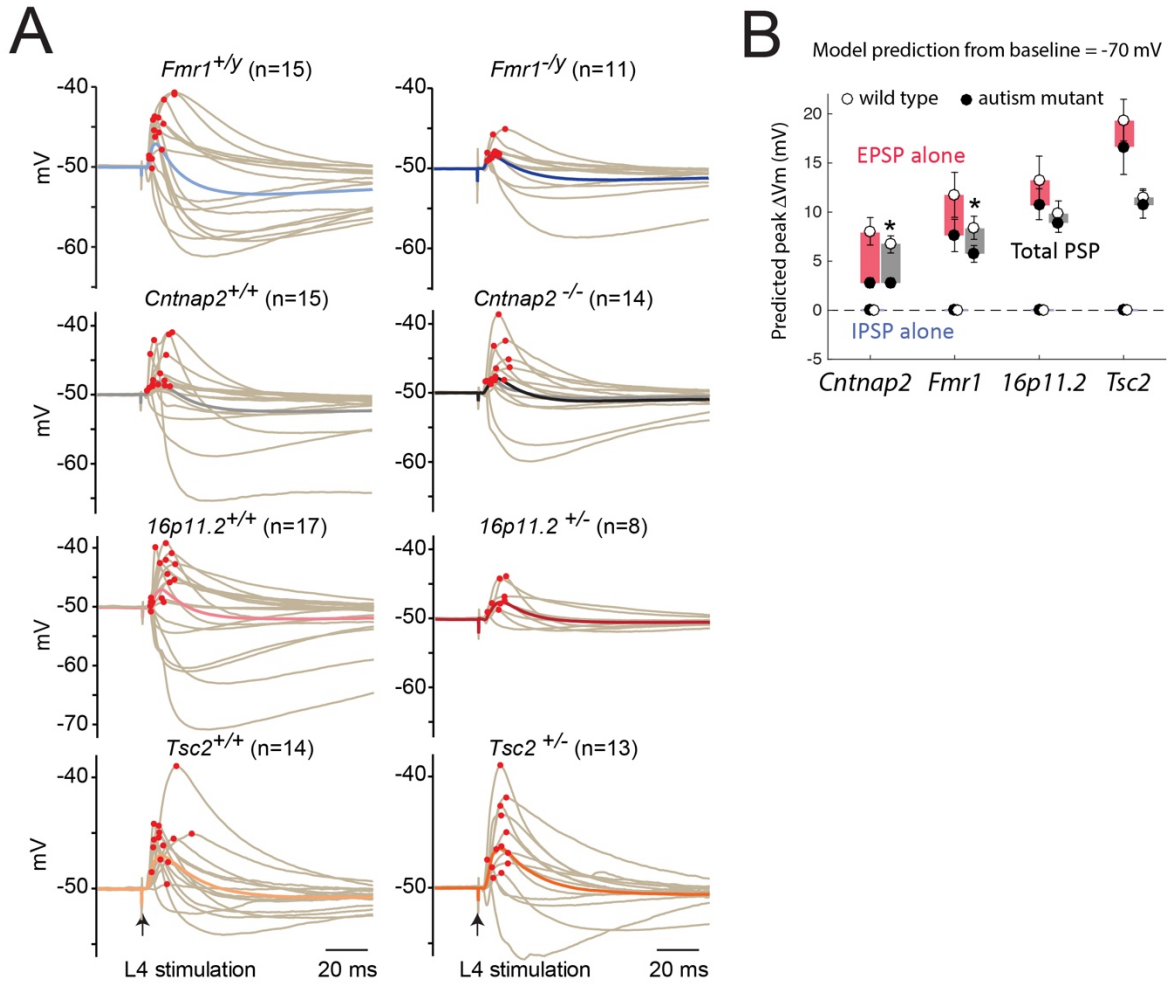

**Figure S5. Validation of model results by measuring L4-evoked PSPs with NMDA currents blocked, and model results from baseline Vm of -70 mV. Related to Figure 4.**

**(A)** Validation of model results by measuring L4-evoked PSPs with NMDA currents blocked. Measurements were from baseline Vm of -50 mV, with L4 stimulation at 1.4x E $\theta$ . Each trace is one cell (mean of 16 sweeps). APV was present to block NMDA currents, in order to better match the conditions of parallel conductance model, which lacks voltage-activated conductances. Dots show the peak depolarization for each cell. Bold traces show mean PSP.

**(B)** Model predictions of PSPs from baseline Vm of -70 mV. Circles show mean predicted EPSP, IPSP, and total PSP peak for each genotype. Results show a predicted decrease in evoked PSP peak. Stars,  $p < 0.05$ , KS test.



# A L4 RS

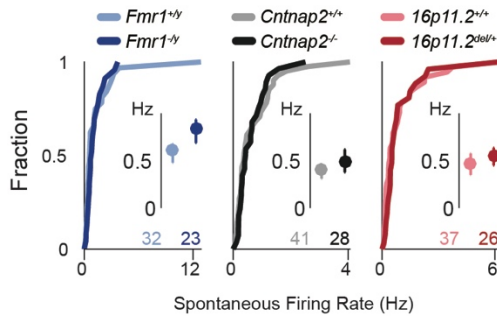

# B L4 RS

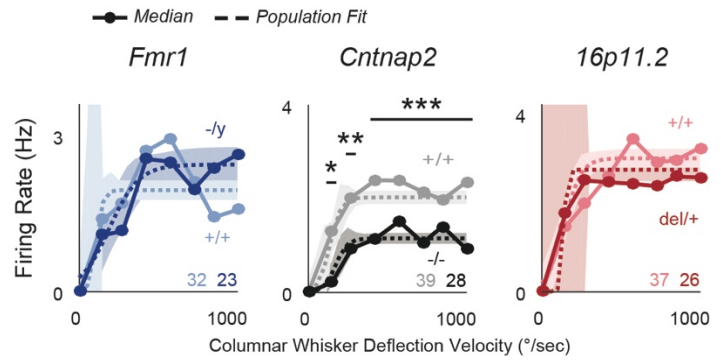

**Figure S6. Firing of L4 RS units is largely normal in anesthetized mice *in vivo*. Related to Figure 6.**

(A) Spontaneous firing rate for L4 RS units, shown as cumulative distributions. Insets: Bootstrapped medians with 68% CI. In all panels, numbers are units per genotype.

(B) Velocity response curves. Conventions as in Figures 5-6. \*  $p=0.04$ , \*\*  $p=0.004$ , \*\*\*  $p<0.0001$  t-test. CI for *Fmr1*<sup>+/+</sup> and *16p11.2*<sup>+/+</sup> are truncated at axis limit.

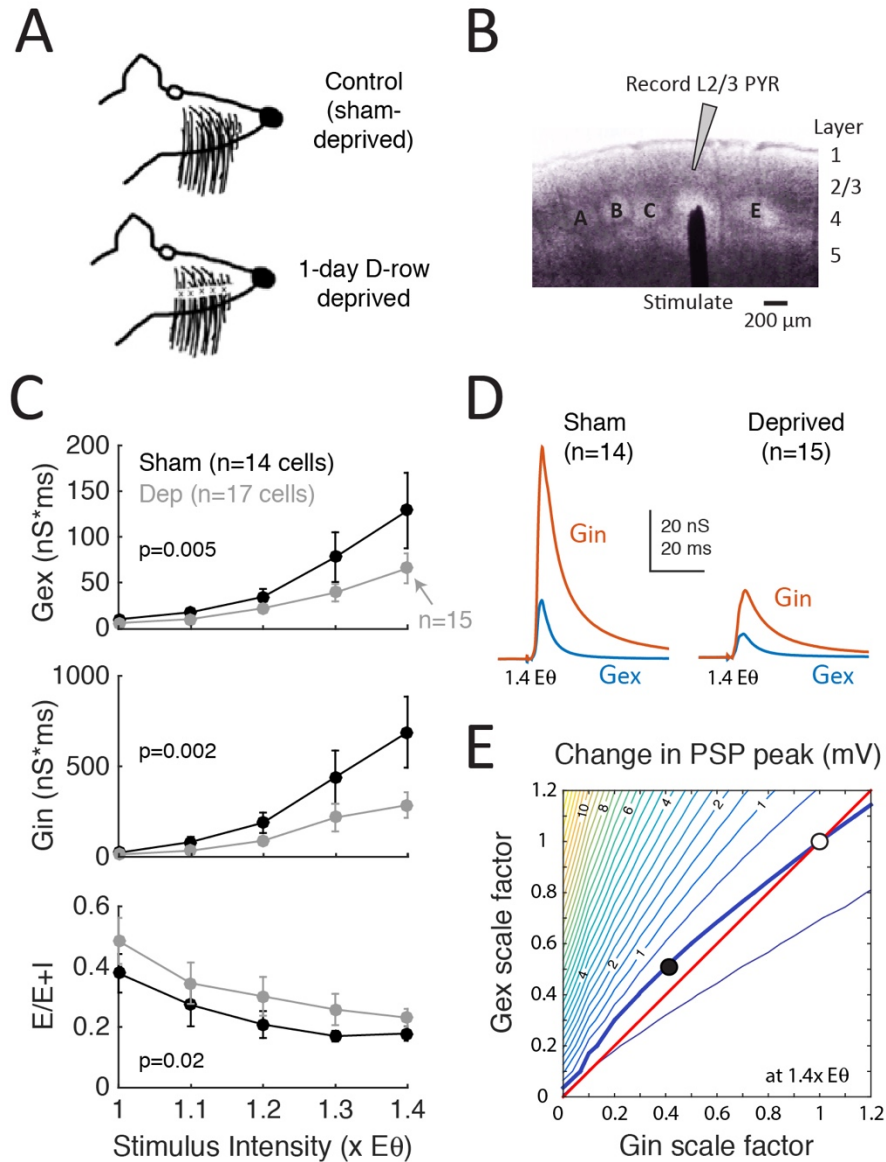

**Figure S7. Brief whisker deprivation induces E-I homeostasis, including increased E-I ratio, to stabilize PSP peak in L2/3 PYR cells. Related to Figure 3.**

This figure is based on data from (Gainey et al., 2018), who studied the effect of 1-day whisker deprivation on Gex, Gin and E-I conductance ratio in the L4-L2/3 feedforward projection in S1 in wild type C57BL/6 mice. Recording and analysis methods were identical to the current study.

(A) Mice had D-row whiskers trimmed at P17-20 for 24 hrs. Age-matched, sham-deprived littermates were used as controls. After 24 hr, S1 slices were prepared and used to assay for changes in L4-L2/3 feedforward circuit physiology.

**(B)** Recordings were made in the D column of S1 slices. L4-evoked Gex and Gin were measured in L2/3 PYR cells, using identical methods to the current study. Input-output curves were characterized in response to L4 stimulation at 1.0-1.4x E $\theta$ .

**(C)** Input-output curves for Gex, Gin and E-I ratio. These show that deprivation reduced Gex and Gin, and increased E-I ratio. Points are mean  $\pm$  SEM across cells. p-values represent deprived vs. sham factor in 2-factor ANOVA. The increase in E-I ratio indicates that deprivation weakened Gin more than Gex in individual cells.

**(D)** Mean Gex and Gin waveforms across cells, in response to L4 stimulation at 1.4x E $\theta$ . On average, deprivation reduced Gex to 0.51 of control levels, and reduced Gin to 0.41 of control levels.

**(E)** Contour plot showing predicted change in evoked PSP peak for control (non-deprived cells) in response to scaling Gex and Gin by different amounts. Contour labels are in mV. The thick contour is the PSP stability contour. Red line, stable E-I ratio. This is the same method as in Figure 3D. ○, average Gex and Gin of control cells [(1,1) by definition]. ●, average Gex and Gin measured after 1 day deprivation, as fraction of control. The substantial changes in Gex and Gin offset each other, so that no change in PSP peak is predicted. This is a new simulation based on data in Gainey et al. (Gainey et al., 2018). Direct measurement of L4-evoked PSPs in L2/3 PYR cells confirmed that deprivation does not alter PSP peak (Gainey et al., 2018).

## Supplemental Tables

| Figure |     | <i>Fmr1</i> |            | <i>Cntnap2</i> |            | <i>16p11.2</i> |            | <i>Tsc2</i> |            |
|--------|-----|-------------|------------|----------------|------------|----------------|------------|-------------|------------|
|        |     | N mice      | Age (days) | N mice         | Age (days) | N mice         | Age (days) | N mice      | Age (days) |
| 1      | wt  | 5           | 19.3±0.3   | 4              | 17.9±0.2   | 5              | 19.7±0.5   | 3           | 18.5±0.4   |
|        | mut | 5           | 19.6±0.4   | 5              | 18.8±0.4   | 5              | 19.3±0.7   | 5           | 18.3±0.4   |
| 2C     | wt  | 5           | 20.8±0.8   | 4              | 21.0±1.4   | 5              | 19.4±0.7   | 6           | 18.7±0.7   |
|        | mut | 5           | 19.6±0.7   | 4              | 22.2±0.5   | 5              | 20.2±0.9   | 5           | 19.0±0.7   |
| 2E-F   | wt  | 5           | 21.2±0.3   | 3              | 19.9±0.3   | 3              | 19.4±0.2   | 8           | 19.2±0.3   |
|        | mut | 5           | 20.4±0.4   | 3              | 21.4±0.4   | 4              | 21.4±0.3   | 3           | 22.2±0.3   |
| 4E-F   | wt  | 3           | 20.3±0.1   | 3              | 22.5±0.1   | 2              | 18.2±0.3   | 4           | 20.6±0.4   |
|        | mut | 3           | 21.5±0.1   | 3              | 21.4±0.5   | 4              | 20.0±0.0   | 3           | 20.8±0.6   |
| S3A-C  | wt  | 3           | 21.1±0.3   | 5              | 20.3±0.5   | 3              | 19.8±0.4   | 3           | 22.4±0.1   |
|        | mut | 3           | 21.0±0.3   | 4              | 18.9±0.5   | 3              | 20.6±0.4   | 4           | 21.8±0.6   |
| S4     | wt  | 5           | 20.9±0.3   | 6              | 19.8±0.3   | 6              | 18.8±0.3   | 12          | 19.3±0.3   |
|        | mut | 7           | 19.1±0.5   | 6              | 20.1±0.4   | 7              | 20.1±0.6   | 4           | 21.4±0.7   |
| S3D    | wt  | 4           | 21.7±0.5   | 3              | 22.3±0.2   | 6              | 20.3±0.5   | 3           | 18.3±0.2   |
|        | mut | 4           | 19.7±0.3   | 3              | 21.9±0.2   | 3              | 20.2±0.6   | 5           | 21.5±0.4   |

**Table S1: Number and age of mice for *in vitro* experiments. Related to Figures 1, 2 and 4.**

Number of mice and age (mean±SEM) for each experiment. wt, wild type. mut, mutant.

|                               | Fmr1 <sup>+/y</sup><br>Fmr1 <sup>-y</sup> | Cntnap2 <sup>+/+</sup><br>Cntnap2 <sup>-/-</sup> | 16p11.2 <sup>+/+</sup><br>16p11.2 <sup>del/+</sup> | Tsc2 <sup>+/+</sup><br>Tsc2 <sup>+/-</sup> |
|-------------------------------|-------------------------------------------|--------------------------------------------------|----------------------------------------------------|--------------------------------------------|
| EPSC amplitude at Eθ (nA)     | -0.098 ± 0.02<br>-0.064 ± 0.01            | -0.099 ± 0.02<br>-0.054 ± 0.01                   | -0.054 ± 0.01<br>-0.070 ± 0.01                     | -0.050 ± 0.01<br>-0.070 ± 0.01             |
| Stimulus intensity at Eθ (μA) | 6.6 ± 0.9<br>5.4 ± 0.6                    | 6.5 ± 0.6<br>5.5 ± 0.8                           | 5.8 ± 0.9<br>4.1 ± 0.2                             | 3.5 ± 0.1<br>4.4 ± 0.5                     |
| V <sub>rest</sub> (mV)        | -78.0 ± 1.1<br>-78.6 ± 1.0                | -76.7 ± 1.0<br>-77.9 ± 1.0                       | -79.7 ± 1.6<br>-79.5 ± 1.3                         | -82.3 ± 1.2<br>-81.6 ± 1.1                 |
| C <sub>m</sub> (pF)           | 171.1 ± 17.3<br>183.6 ± 18.3              | 149.6 ± 17.3<br>115.9 ± 21.6                     | 215.7 ± 12.5<br>209.7 ± 17.3                       | 192.6 ± 11.4<br>213.1 ± 12.4               |
| R <sub>input</sub> (MΩ)       | 325.3 ± 37.7<br>316.9 ± 18.8              | 298.2 ± 41.6<br>324.2 ± 38.1                     | 250.2 ± 40.6<br>243.9 ± 37.3                       | 349.5 ± 29.0<br>267.6 ± 23.6*              |
| EPSC onset latency (ms)       | 2.6 ± 0.1<br>2.9 ± 0.2                    | 2.6 ± 0.2<br>2.5 ± 0.1                           | 2.8 ± 0.1<br>2.4 ± 0.2                             | 2.2 ± 0.1<br>2.4 ± 0.1                     |
| IPSC onset latency (ms)       | 4.2 ± 0.3<br>4.3 ± 0.3                    | 5.0 ± 0.5<br>5.3 ± 0.3                           | 4.0 ± 0.1<br>4.1 ± 0.3                             | 3.3 ± 0.3<br>3.4 ± 0.1                     |
| EPSC peak latency (ms)        | 7.6 ± 0.3<br>6.6 ± 0.4                    | 8.0 ± 0.3<br>7.0 ± 0.5                           | 6.8 ± 0.4<br>6.3 ± 0.5                             | 5.7 ± 0.2<br>6.3 ± 0.4                     |
| IPSC peak latency (ms)        | 9.5 ± 0.7<br>8.1 ± 0.5                    | 9.4 ± 0.9<br>7.5 ± 0.5                           | 7.8 ± 0.7<br>8.3 ± 0.8                             | 6.5 ± 0.2<br>7.6 ± 0.8                     |
| IPSC-EPSC peak latency (ms)   | 1.9 ± 0.6<br>1.0 ± 0.5                    | 1.5 ± 0.7<br>0.8 ± 0.7                           | 0.9 ± 0.5<br>1.8 ± 0.7                             | 0.8 ± 0.3<br>1.2 ± 0.5                     |

**Table S2: Cellular properties of L2/3 PYR neurons for Figure 1 experiments. Related to Figure 1.**

Entries are mean ± SEM for each ASD mutant genotype (bottom) and corresponding wild-type control (top). Asterisk shows significant difference (p<0.05, Mann-Whitney) between mutant and wild type comparison. No other measures were significantly different.

|                                                 | <i>Fmr1</i> <sup>+y</sup><br><i>Fmr1</i> <sup>-y</sup> | <i>Cntnap2</i> <sup>+/+</sup><br><i>Cntnap2</i> <sup>-/-</sup> | <i>16p11.2</i> <sup>+/+</sup><br><i>16p11.2</i> <sup>del/+</sup> | <i>Tsc2</i> <sup>+/+</sup><br><i>Tsc2</i> <sup>+/-</sup> |
|-------------------------------------------------|--------------------------------------------------------|----------------------------------------------------------------|------------------------------------------------------------------|----------------------------------------------------------|
| General passive and spiking properties          |                                                        |                                                                |                                                                  |                                                          |
| Membrane time constant ( $\tau_{mem}$ ) (ms)    | 32.4 ± 2.9<br>34.1 ± 4.0                               | 35.9 ± 3.5<br>40.7 ± 4.4                                       | 37.5 ± 2.0<br>41.7 ± 3.3                                         | 35.3 ± 4.8<br>35.0 ± 5.6                                 |
| $R_{input}$ (M $\Omega$ )                       | 92.8 ± 6.6<br>98.2 ± 5.8                               | 117.0 ± 9.8<br>102.6 ± 11.3                                    | 99.9 ± 9.0<br>111.3 ± 20                                         | 126.1 ± 16.8<br>112.0 ± 14.5                             |
| $V_{rest}$ (mV)                                 | -81.6 ± 1.0<br>-82.6 ± 0.8                             | -83.3 ± 1.1<br>-83.6 ± 1.5                                     | -85.1 ± 1.0<br>-81.3 ± 1.8                                       | -82.0 ± 1.2<br>-75.0 ± 1.3                               |
| Spike threshold (mV)                            | -43.4 ± 1.5<br>-46.9 ± 1.3                             | -44.5 ± 1.2<br>-45.1 ± 1.0                                     | -45.2 ± 1.0<br>-43.9 ± 1.2                                       | -47.2 ± 1.1<br>-45.6 ± 1.5                               |
| Rheobase (pA)                                   | 248.6 ± 17.1<br>222.4 ± 17.9                           | 19.4 ± 17.8<br>220.3 ± 15.9                                    | 244.7 ± 16.4<br>211.0 ± 21.7                                     | 205.0 ± 29.9<br>227.4 ± 28.8                             |
| Numeric values for L4-evoked spiking (Panel 2F) |                                                        |                                                                |                                                                  |                                                          |
| Num. evoked spikes (mean ± SEM)                 | 0.41 ± 0.3<br>0.27 ± 0.2                               | 1.46 ± 0.6<br>0.23 ± 0.2                                       | 0.23 ± 0.2<br>1.67 ± 0.9                                         | 0.53 ± 0.2<br>2.20 ± 1.5                                 |
| Mann-Whitney test                               | p=0.94                                                 | p=0.09                                                         | p=0.22                                                           | p=0.64                                                   |
| % of cells with L4-evoked spiking               | 2/17 (11.8%)<br>2/11 (18.2%)                           | 6/13 (46.1%)<br>2/13 (15.4%)                                   | 2/13 (15.4%)<br>6/18 (33.3%)                                     | 7/19 (36.8%)<br>2/10 (20.0%)                             |
| Fisher's exact test                             | p=0.99                                                 | p=0.20                                                         | p=0.41                                                           | p=0.43                                                   |

**Table S3: Cellular properties of L2/3 PYR neurons for Figure 2 experiments. Related to Figure 2.**

Conventions as for Table S2. No measures were significantly different between mutant and corresponding wild-type genotype.

|                                                               | <i>Fmr1</i><br>+/y | <i>Fmr1</i><br>-/y | <i>Cntnap2</i><br>+/+ | <i>Cntnap2</i><br>-/- | <i>16p11.2</i><br>+/+ | <i>16p11.2</i><br>del/+ |
|---------------------------------------------------------------|--------------------|--------------------|-----------------------|-----------------------|-----------------------|-------------------------|
| L2/3 recordings, anesthetized mice (Figures 5 & 6)            |                    |                    |                       |                       |                       |                         |
| Total mice                                                    | 11                 | 9                  | 7                     | 9                     | 12                    | 6                       |
| Age (Mean±SEM)                                                | 69.2±1.1           | 65.5±1.3           | 64.4±1.3              | 61.2±1.4              | 52.2±0.6              | 48.8±1.1                |
| L2/3 FS units, anesthetized mice (Figure 5)                   |                    |                    |                       |                       |                       |                         |
| Total FS units                                                | 17                 | 32                 | 18                    | 25                    | 30                    | 19                      |
| Spontaneous firing Units (mice)                               | 17 (6)             | 32 (8)             | 18 (7)                | 25 (9)                | 30 (10)               | 19 (5)                  |
| VRC <sup>1</sup> Units (mice)                                 | 17 (6)             | 32 (8)             | 17 (6)                | 25 (9)                | 30 (10)               | 19 (5)                  |
| L2/3 RS units, anesthetized mice (Figure 6)                   |                    |                    |                       |                       |                       |                         |
| Total RS Units                                                | 49                 | 86                 | 35                    | 39                    | 85                    | 32                      |
| Spontaneous firing Units (mice)                               | 49 (11)            | 86 (9)             | 35 (7)                | 39 (9)                | 85 (12)               | 32 (6)                  |
| VRC <sup>1</sup> Units (mice)                                 | 48 (10)            | 86 (9)             | 31 (6)                | 39 (9)                | 80 (11)               | 32 (6)                  |
| Best whisker firing <sup>2</sup> Units (mice)                 | 31 (8)             | 75 (7)             | 29 (5)                | 24 (7)                | 75 (10)               | 32 (6)                  |
| Jitter, CW tuning, tuning sharpness <sup>3</sup> Units (mice) | 19 (10)            | 46 (8)             | 9 (6)                 | 15 (6)                | 38 (9)                | 19 (6)                  |
| Correlations and synchrony <sup>4</sup> . Pairs (units, mice) | 95 (42,7)          | 303 (82,8)         | 44 (30,7)             | 62 (32,6)             | 290 (78,10)           | 46 (28,5)               |
| L4 RS units, anesthetized mice (Figure S6)                    |                    |                    |                       |                       |                       |                         |
| Total mice                                                    | 8                  | 5                  | 8                     | 9                     | 9                     | 6                       |
| Total RS units                                                | 32                 | 23                 | 41                    | 28                    | 37                    | 26                      |
| Spontaneous firing Units (mice)                               | 32 (8)             | 23 (5)             | 41 (8)                | 28 (9)                | 37 (9)                | 26 (6)                  |
| VRC <sup>1</sup> Units (mice)                                 | 32 (8)             | 23 (5)             | 39 (7)                | 28 (9)                | 37 (9)                | 26 (6)                  |

<sup>1</sup> Velocity response curve (VRC) was quantified for all units for which the VRC stimulus protocol was applied to the unit's columnar whisker.

<sup>2</sup> Best whisker (BW)-evoked firing rate was quantified for all units whose columnar whisker was at the center of the 3x3 piezo array. This criterion ensures the greatest accuracy for identifying the BW.

<sup>3</sup> Jitter, columnar whisker (CW) tuning, and tuning sharpness were quantified for all whisker-responsive units.

<sup>4</sup> Signal and noise correlations and firing synchrony were calculated across all pairs of simultaneously recorded L2/3 RS units located < 0.2 mm apart.

**Table S4: Sample sizes for *in vivo* anesthetized experiments. Related to Figures 5-6.**

Number of units and mice in each analysis for *in vivo* anesthetized experiments.
